# Supplementary material for: Abortion: Life-Course Stages and Disruptive Life Events
Source: publisher site journal article supplement (doi:10.1515/zfsoz-2021-0018), 2021-08-01
Supplement: Supplementary file 1 [file Minkus-Drobnic_Abortion_Online-Anhang.pdf]

# Abortion: Life-Course Stages and Disruptive Life Events

## Online-Anhang / Online Appendix

**Lara Minkus/ Sonja Drobnič**

University of Bremen, SOCIUM, Mary-Somerville-Str. 9, 28359 Bremen, Germany

## Content

**Table A.1.:** Intention to have (additional) children

**Table A.2.:** Estimates of the likelihood of abortion. Linear Probability Models LPM

**Table A.3.:** Estimates of the likelihood of abortion, excluding “currently enrolled”. Linear Probability Models LPM

**Table A.4.:** Estimates of the likelihood of abortion. Logistic regression, reported are average marginal effects

**Table A.5.:** Estimates of the likelihood of abortion. Respondents who did not want to answer the question are coded together with those who reported having obtained an abortion. Linear Probability Models LPM

Table A.1. Intention to have (additional) children

|                             | Abortion | Childbirth |
|-----------------------------|----------|------------|
| Yes                         | 0.47     | 0.46       |
| Unsure/not thought about it | 0.11     | 0.09       |
| No                          | 0.42     | 0.45       |
| Observations                | 584      | 53891      |

Source:

pairfam release 11.0, own calculations, not weighted.

Note: The numbers on abortion and childbirth differ from those used in further analysis because Table A.1. is based on all respondents who reported a valid answer on the question of induced abortion, further sample restrictions are not yet applied.

Table A.2. Estimates of the likelihood of abortion. Linear Probability Models LPM

|                                           | Women                |         | Men                  |         |
|-------------------------------------------|----------------------|---------|----------------------|---------|
| <b>Personal attributes</b>                |                      |         |                      |         |
| Age < 20 years (ref. = 20–35)             | 0.117 <sup>+</sup>   | (0.060) | 0.164 <sup>+</sup>   | (0.093) |
| Age > 35 years (ref. = 20–35)             | 0.054 <sup>*</sup>   | (0.025) | 0.022                | (0.021) |
| Religious service attendance (=1)         | -0.072 <sup>**</sup> | (0.022) | -0.073 <sup>**</sup> | (0.024) |
| <b>Relationship and Family</b>            |                      |         |                      |         |
| One child (ref. = no children)            | -0.016               | (0.018) | 0.029                | (0.019) |
| Two or more children (ref. = no children) | 0.094 <sup>***</sup> | (0.028) | 0.080 <sup>**</sup>  | (0.027) |
| Union dissolution (=1)                    | 0.328 <sup>***</sup> | (0.050) | 0.244 <sup>***</sup> | (0.073) |
| <b>Socioeconomic aspects</b>              |                      |         |                      |         |
| Currently enrolled (=1)                   | 0.123 <sup>**</sup>  | (0.046) | 0.164 <sup>**</sup>  | (0.056) |
| Unemployment (=1)                         | 0.097 <sup>**</sup>  | (0.036) | 0.068                | (0.042) |
| Satisfaction w/ HH finances               | -0.009 <sup>*</sup>  | (0.004) | -0.001               | (0.004) |
| City >500,000 inhabitants (=1)            | 0.051 <sup>*</sup>   | (0.025) | -0.004               | (0.024) |
| <b>Controls</b>                           |                      |         |                      |         |
| University entrance qualification (=1)    | -0.028               | (0.017) | -0.041 <sup>*</sup>  | (0.018) |
| Poor health (=1)                          | 0.019                | (0.023) | 0.047                | (0.038) |
| Living in East Germany (=1)               | 0.001                | (0.020) | -0.006               | (0.020) |
| Yearly dummies                            |                      | ✓       |                      | ✓       |
| Constant                                  | 0.172 <sup>***</sup> | (0.041) | 0.083 <sup>*</sup>   | (0.040) |
| Observations                              | 1738                 |         | 1390                 |         |
| R <sup>2</sup>                            | 0.17                 |         | 0.09                 |         |

Standard errors in parentheses. Source: pairfam release 11.0, own calculations, not weighted. <sup>+</sup>  $p < 0.10$ , <sup>\*</sup>  $p < 0.05$ , <sup>\*\*</sup>  $p < 0.01$ , <sup>\*\*\*</sup>  $p < 0.001$

Table A.3. Estimates of the likelihood of abortion, excluding “currently enrolled”. Linear Probability Models LPM

|                                           | Women    |         | Men                 |         |
|-------------------------------------------|----------|---------|---------------------|---------|
| <b>Personal attributes</b>                |          |         |                     |         |
| Age < 20 years (ref. = 20–35)             | 0.186**  | (0.057) | 0.268**             | (0.093) |
| Age > 35 years (ref. = 20–35)             | 0.050*   | (0.025) | 0.015               | (0.021) |
| Religious service attendance (=1)         | -0.066** | (0.022) | -0.070**            | (0.025) |
| <b>Relationship and Family</b>            |          |         |                     |         |
| One child (ref. = no children)            | -0.023   | (0.018) | 0.024               | (0.019) |
| Two or more children (ref. = no children) | 0.087**  | (0.028) | 0.075**             | (0.027) |
| Union dissolution (=1)                    | 0.343*** | (0.050) | 0.274***            | (0.072) |
| <b>Socioeconomic aspects</b>              |          |         |                     |         |
| Currently enrolled (=1)                   |          | X       |                     | X       |
| Unemployment (=1)                         | 0.088*   | (0.037) | 0.057               | (0.042) |
| Satisfaction w/ HH finances               | -0.010*  | (0.004) | -0.002              | (0.004) |
| City >500,000 inhabitants (=1)            | 0.055*   | (0.025) | -0.005              | (0.025) |
| <b>Controls</b>                           |          |         |                     |         |
| University entrance qualification (=1)    | -0.025   | (0.017) | -0.034 <sup>+</sup> | (0.018) |
| Poor health (=1)                          | 0.019    | (0.023) | 0.045               | (0.038) |
| Living in East Germany (=1)               | 0.005    | (0.020) | -0.009              | (0.020) |
| Yearly dummies                            |          | ✓       |                     | ✓       |
| Constant                                  | 0.187*** | (0.040) | 0.100*              | (0.041) |
| Observations                              | 1738     |         | 1390                |         |
| R <sup>2</sup>                            | 0.16     |         | 0.08                |         |

Standard errors in parentheses. Source: pairfam release 11.0, own calculations, not weighted. <sup>+</sup>  $p < 0.10$ , \*  $p < 0.05$ , \*\*  $p < 0.01$ , \*\*\*  $p < 0.001$

Table A.4. Estimates of the likelihood of abortion. Logistic regression, reported are average marginal effects

|                                           | Women                |         | Men                  |         |
|-------------------------------------------|----------------------|---------|----------------------|---------|
| <b>Personal attributes</b>                |                      |         |                      |         |
| Age < 20 years (ref. = 20–35)             | 0.070 <sup>+</sup>   | (0.037) | 0.079 <sup>+</sup>   | (0.044) |
| Age > 35 years (ref. = 20–35)             | 0.057 <sup>*</sup>   | (0.022) | 0.023                | (0.020) |
| Religious service attendance (=1)         | -0.094 <sup>**</sup> | (0.033) | -0.086 <sup>*</sup>  | (0.037) |
| <b>Relationship and Family</b>            |                      |         |                      |         |
| One child (ref. = no children)            | -0.019               | (0.022) | 0.036                | (0.022) |
| Two or more children (ref. = no children) | 0.082 <sup>***</sup> | (0.023) | 0.078 <sup>**</sup>  | (0.024) |
| Union dissolution (=1)                    | 0.181 <sup>***</sup> | (0.025) | 0.137 <sup>***</sup> | (0.035) |
| <b>Socioeconomic aspects</b>              |                      |         |                      |         |
| Currently enrolled (=1)                   | 0.098 <sup>***</sup> | (0.030) | 0.126 <sup>***</sup> | (0.033) |
| Unemployment (=1)                         | 0.072 <sup>**</sup>  | (0.024) | 0.053 <sup>+</sup>   | (0.028) |
| Satisfaction w/ HH finances               | -0.008 <sup>*</sup>  | (0.004) | -0.002               | (0.004) |
| City >500,000 inhabitants (=1)            | 0.047 <sup>*</sup>   | (0.021) | -0.000               | (0.025) |
| <b>Controls</b>                           |                      |         |                      |         |
| University entrance qualification (=1)    | -0.035 <sup>+</sup>  | (0.020) | -0.046 <sup>*</sup>  | (0.022) |
| Poor health (=1)                          | 0.019                | (0.020) | 0.037                | (0.026) |
| Living in East Germany (=1)               | -0.001               | (0.019) | -0.006               | (0.021) |
| Yearly dummies                            | ✓                    |         | ✓                    |         |
| Observations                              | 1738                 |         | 1390                 |         |
| McFadden's $R^2$                          | 0.17                 |         | 0.10                 |         |

Standard errors in parentheses. Source: pairfam release 11.0, own calculations, not weighted. <sup>+</sup>  $p < 0.10$ , <sup>\*</sup>  $p < 0.05$ , <sup>\*\*</sup>  $p < 0.01$ , <sup>\*\*\*</sup>  $p < 0.001$

Table A.5. Estimates of the likelihood of abortion. Respondents who did not want to answer the question are coded together with those who reported having obtained an abortion. Linear Probability Models LPM

|                                           | Women     |         | Men       |         |
|-------------------------------------------|-----------|---------|-----------|---------|
| <b>Personal attributes</b>                |           |         |           |         |
| Age < 20 years (ref. = 20–35)             | 0.150**   | (0.058) | 0.184*    | (0.079) |
| Age > 35 years (ref. = 20–35)             | 0.286***  | (0.034) | 0.162***  | (0.038) |
| Religious service attendance (=1)         | -0.035    | (0.032) | 0.072     | (0.047) |
| <b>Relationship and Family</b>            |           |         |           |         |
| One child (ref. = no children)            | -0.088*** | (0.024) | -0.072*   | (0.030) |
| Two or more children (ref. = no children) | 0.081*    | (0.034) | 0.068     | (0.047) |
| Union dissolution (=1)                    | 0.259***  | (0.044) | 0.123*    | (0.048) |
| <b>Socioeconomic aspects</b>              |           |         |           |         |
| Currently enrolled (=1)                   | 0.223***  | (0.047) | 0.209***  | (0.058) |
| Unemployment (=1)                         | 0.097*    | (0.038) | 0.124**   | (0.048) |
| Satisfaction w/ HH finances               | -0.008+   | (0.004) | -0.004    | (0.006) |
| City >500,000 inhabitants (=1)            | 0.031     | (0.031) | -0.021    | (0.038) |
| <b>Controls</b>                           |           |         |           |         |
| University entrance qualification (=1)    | -0.102*** | (0.025) | -0.110*** | (0.032) |
| Poor health (=1)                          | 0.015     | (0.028) | -0.009    | (0.046) |
| Living in East Germany (=1)               | -0.022    | (0.025) | 0.003     | (0.030) |
| Yearly dummies                            |           | ✓       |           | ✓       |
| Constant                                  | 0.244***  | (0.043) | 0.260***  | (0.056) |
| Observations                              | 2073      |         | 1443      |         |
| R <sup>2</sup>                            | 0.20      |         | 0.15      |         |

Standard errors in parentheses. Source: pairfam release 11.0, own calculations, not weighted. <sup>+</sup>  $p < 0.10$ , \*  $p < 0.05$ , \*\*  $p < 0.01$ , \*\*\*  $p < 0.001$
